# Supplementary material for: Regulation of gliotoxin biosynthesis and protection in Aspergillus species
Source: PubMed Central journal article supplement (PMC8797188; doi:10.1371/journal.pgen.1009965), 2022-01-18

Control (+SO<sub>4</sub>)

+ Met 1mM

+ Cys 1mM

- S

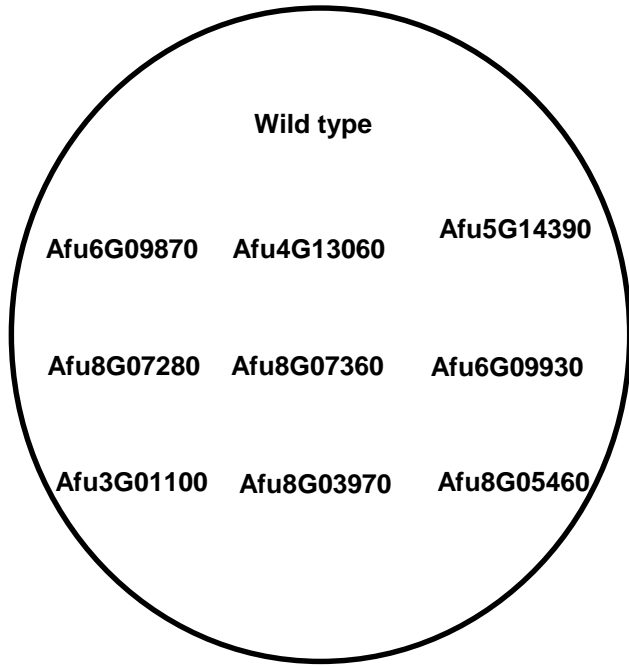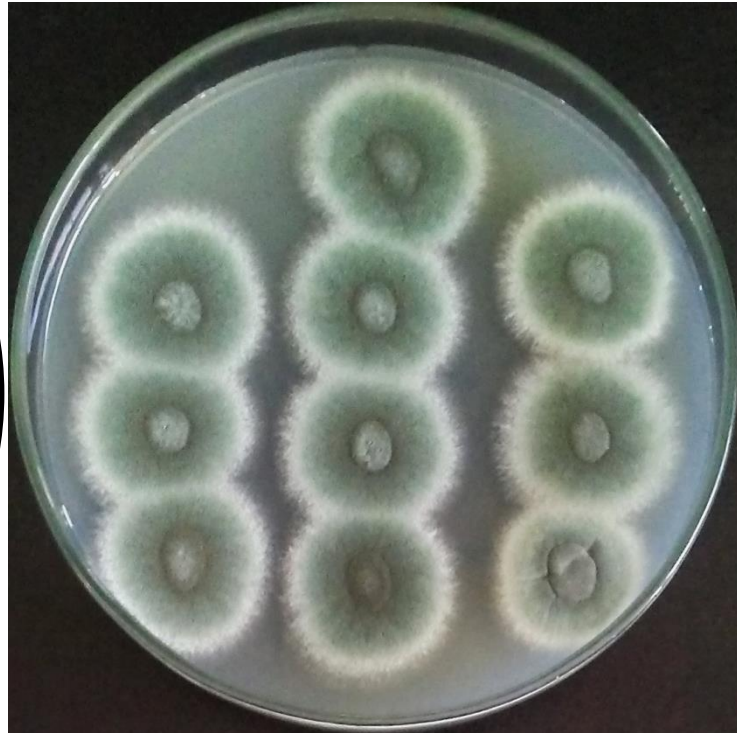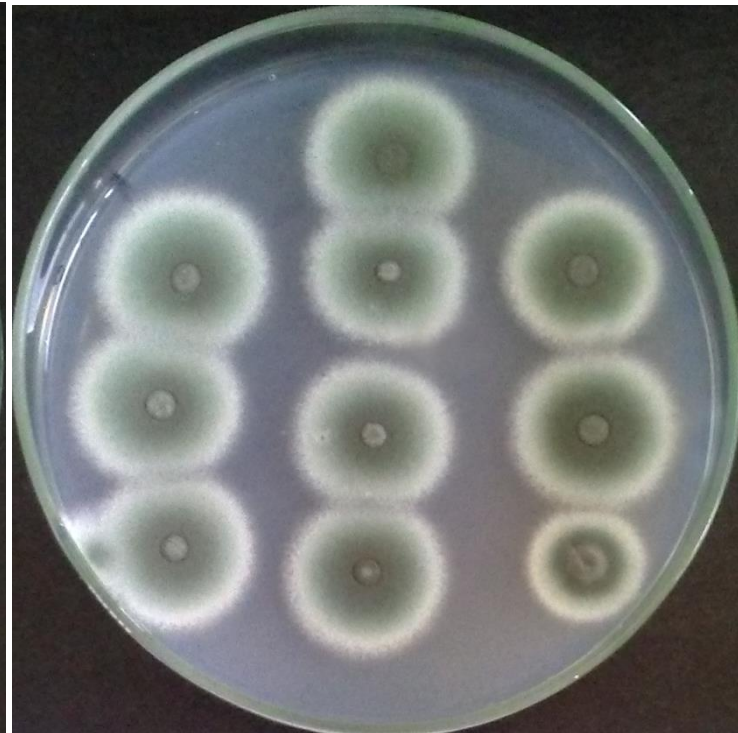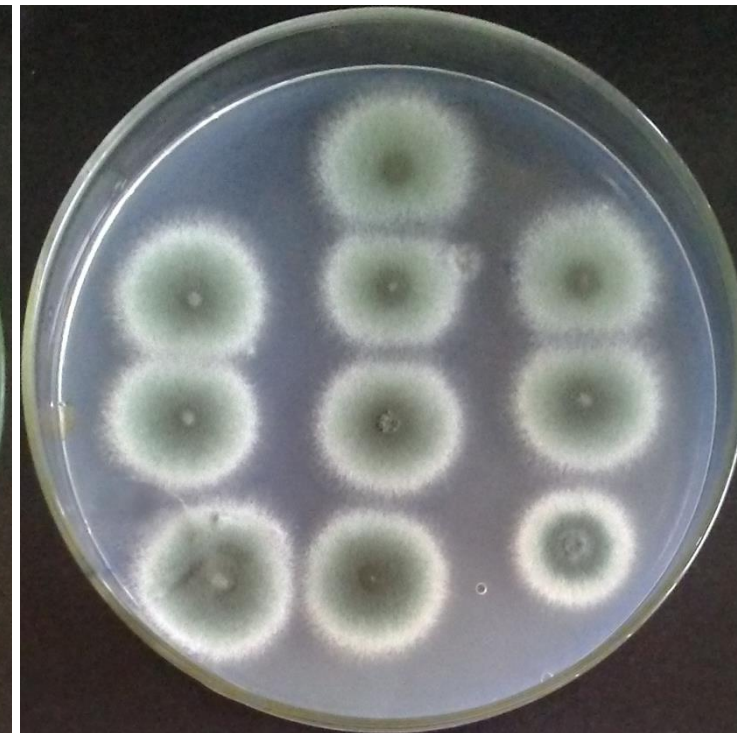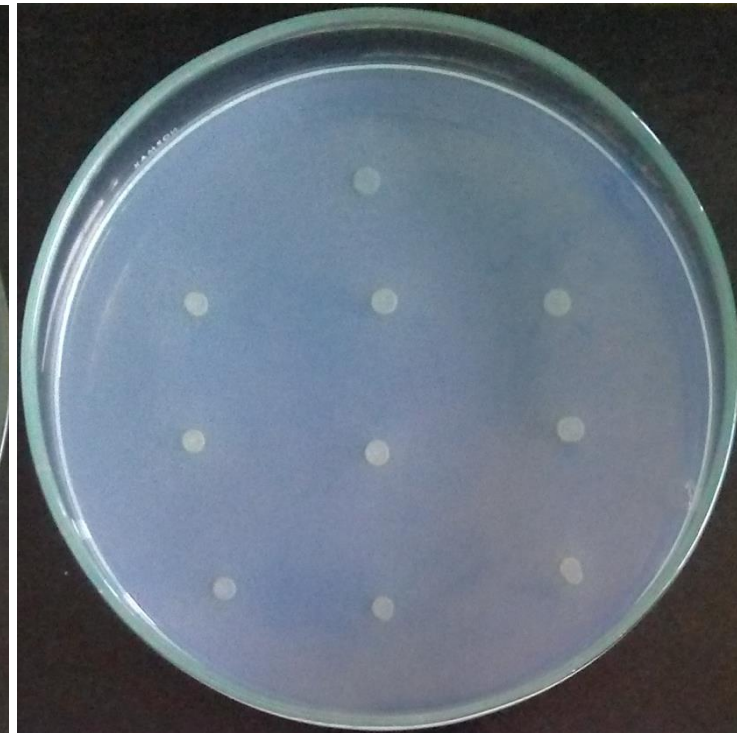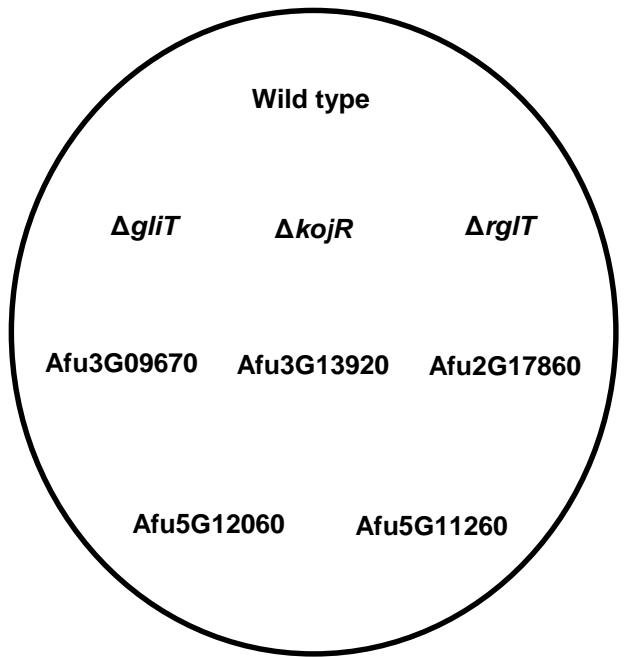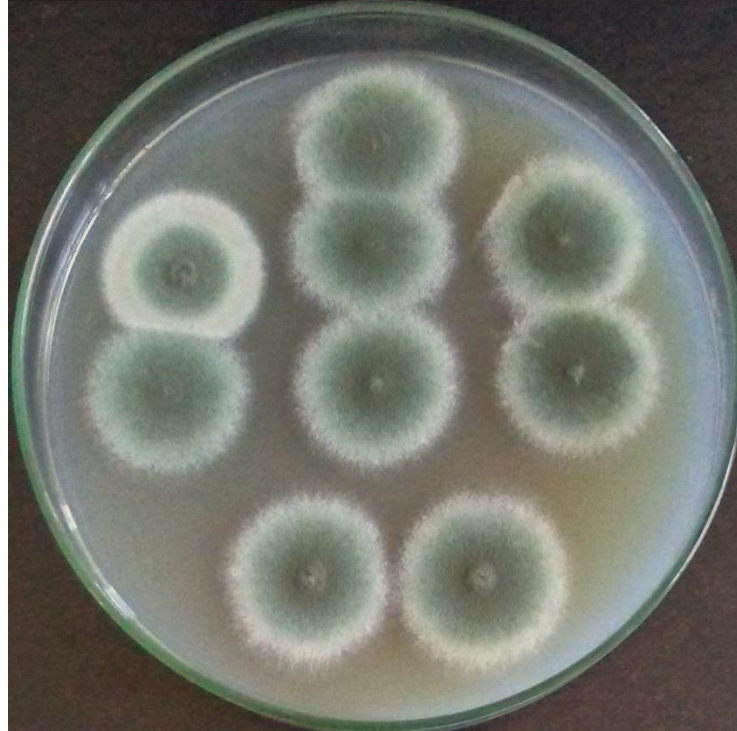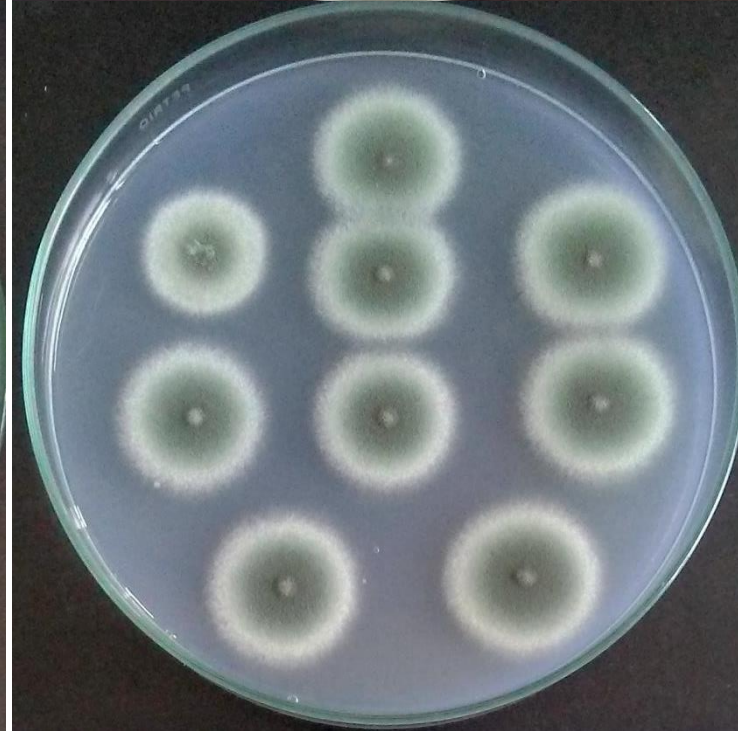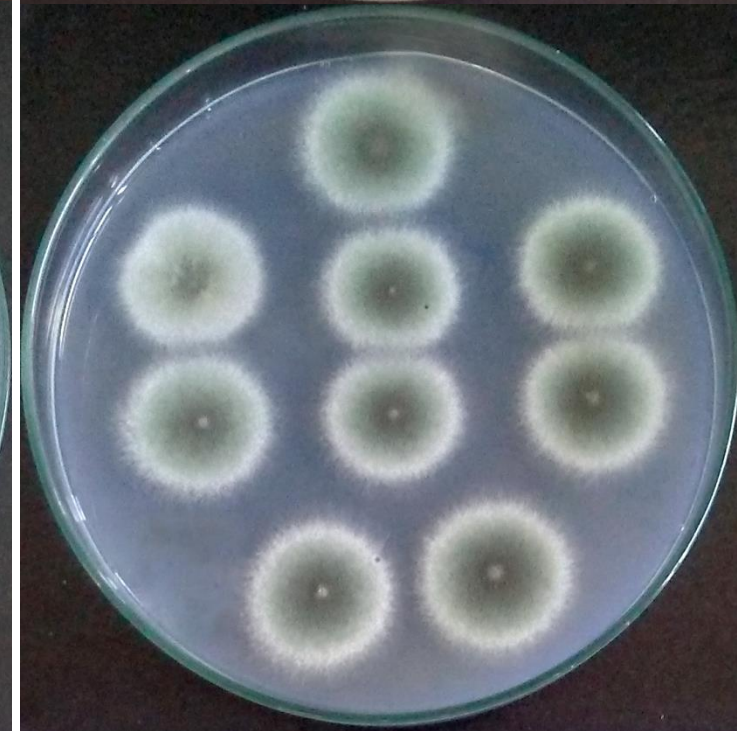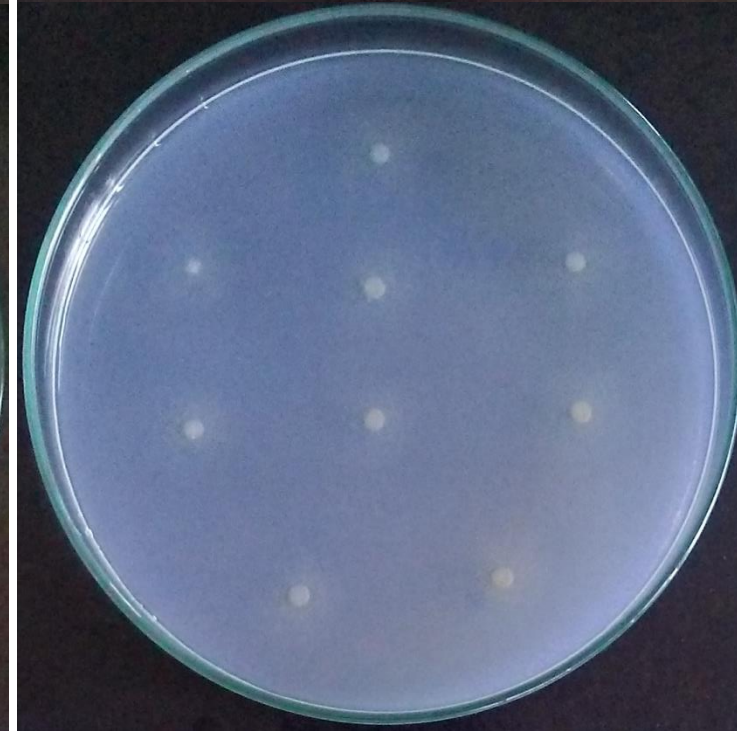

Supplement: pgen.1009965.s003.pdf [file pgen.1009965.s003.pdf]
