# Supplementary material for: Regulation of gliotoxin biosynthesis and protection in Aspergillus species
Source: PubMed Central journal article supplement (PMC8797188; doi:10.1371/journal.pgen.1009965), 2022-01-18

A.

Gliotoxin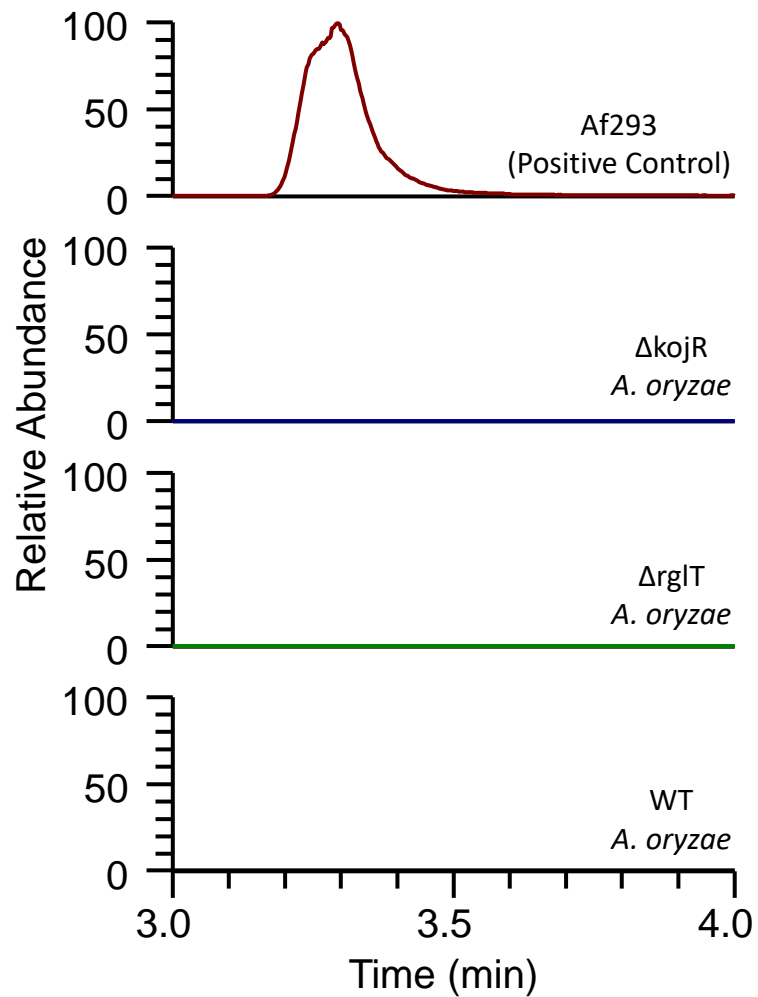

B.

Bis(methylthio)gliotoxin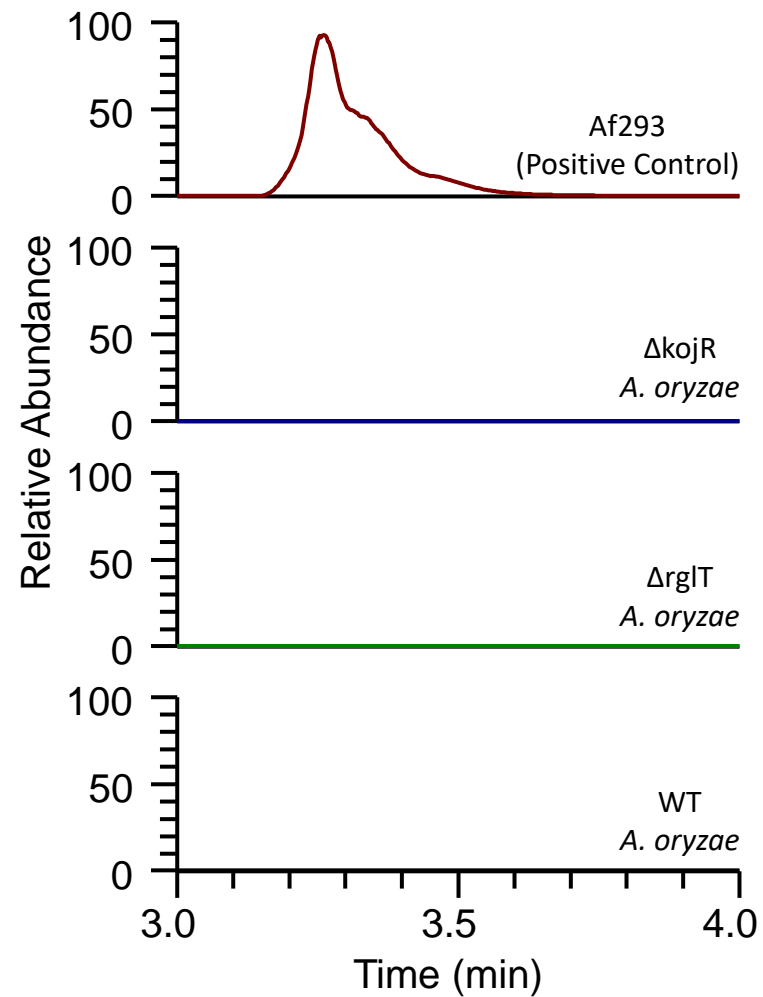

Supplement: pgen.1009965.s004.pdf [file pgen.1009965.s004.pdf]
